# Supplementary material for: Reliability and validity of a novel Kinect-based software program for measuring a single leg squat
Source: PubMed Central journal article supplement (PMC7216608; doi:10.1186/s13102-020-00179-8), 2020-05-11
Supplement: 13102_2020_179_MOESM1_ESM.pdf [file 13102_2020_179_MOESM1_ESM.pdf]

## Overview

## Table of content

|                               |        |
|-------------------------------|--------|
| Standing Posture - Front View | page 2 |
| Standing Posture - Side View  | page 3 |
| Standing Balance - Bilateral  | page 4 |
| Standing Balance - Unilateral | page 5 |
| Standing Side Bend            | page 6 |
| Double Leg Squat              | page 7 |
| Single Leg Squat              | page 8 |

## General information about scan

|                           |                                     |
|---------------------------|-------------------------------------|
| Gender:                   | Female                              |
| Age (years):              | 35                                  |
| Weight (kg):              | 60                                  |
| Discomfort reported:      | No                                  |
| Recent fall reported:     | No                                  |
| Estimated height (cm):    | 176                                 |
| Body mass index (BMI):    | 19.28                               |
| Recorded at (local time): | Tuesday, April 25, 2017 11:56:00 AM |
| Recorded at (UTC):        | Tuesday, April 25, 2017 9:56:00 AM  |

## Movements

|                         |            |             |
|-------------------------|------------|-------------|
| Stand Still - Face View | Attempt #1 | Normal mode |
| Side Bend               | Attempt #1 | Normal mode |
| Two Leg Squat           | Attempt #2 | Normal mode |
| Balance on Right Leg    | Attempt #1 | Normal mode |
| Balance on Left Leg     | Attempt #1 | Normal mode |
| Right Leg Squat         | Attempt #1 | Normal mode |
| Left Leg Squat          | Attempt #1 | Normal mode |

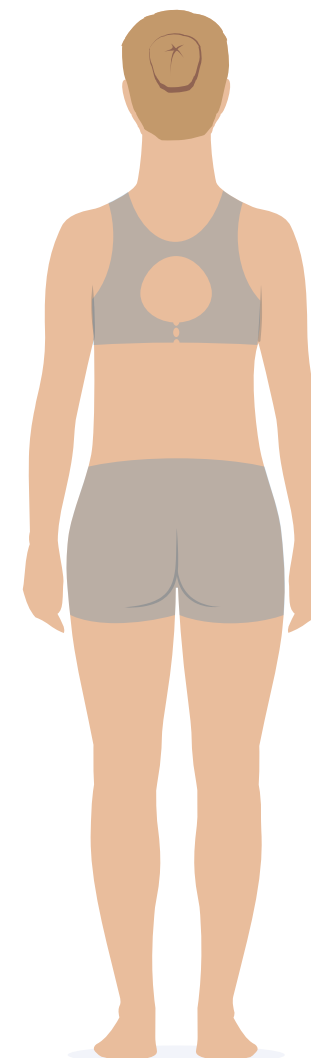

Information in this report should be verified and interpreted by a health professional.  
 Measures are estimates, calculated from a combination of normative anthropometric data and Qinematic™ Posture Scan 3D test data.

## Standing Posture - Front View

This is the front view of the person whilst standing still.  
Vertical alignment is considered zero degrees (deg).

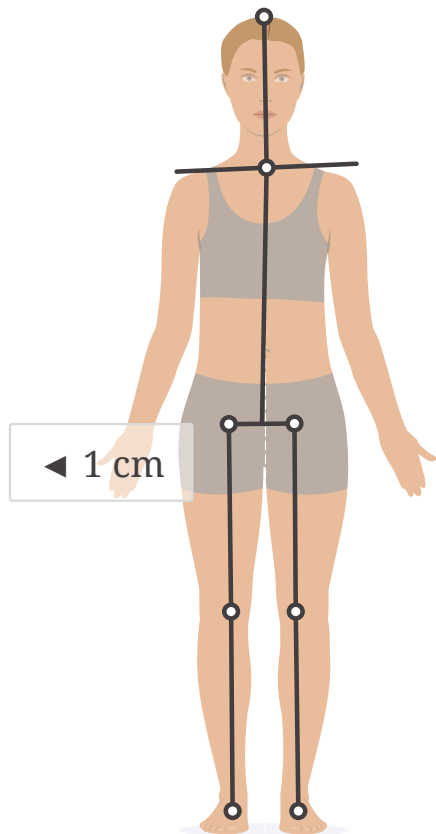

### Estimated height loss caused by poor alignment\*

|             |   |
|-------------|---|
| Centimeters | 0 |
|-------------|---|

\*Calculated based on normative data. Measurement error is estimated to be  $\pm 1$ cm

| Alignment                    | Left | Right | Notes                                            |
|------------------------------|------|-------|--------------------------------------------------|
| Neck angle of tilt (deg)     |      | 1     | Relative to frontal axis.                        |
| Shoulder angle of tilt (deg) | 3    |       | Relative to sagittal axis. Elevated is positive. |
| Pelvic angle of tilt (deg)   | 0    | 0     | Relative to sagittal axis. Elevated is positive. |

| Lateral displacement from midline | Left | Right |
|-----------------------------------|------|-------|
| Center of head (cm)               |      | 1     |
| Center of shoulders (cm)          | 0    | 0     |
| Center of body mass (cm)          | 0    | 0     |
| Center of pelvis (cm)             |      | 1     |

| Critical angles in frontal plane | Left | Right | Notes                     |
|----------------------------------|------|-------|---------------------------|
| Cervicothoracic angle (deg)      |      | 2     | Between trunk and neck.   |
| Lumbopelvic angle (deg)          | 2    |       | Trunk relative to pelvis. |

| Knee angles in frontal plane | Med | Lat |
|------------------------------|-----|-----|
| Left knee (deg)              | 1   |     |
| Right knee (deg)             | 0   | 0   |

Information in this report should be verified and interpreted by a health professional.

Measures are estimates, calculated from a combination of normative anthropometric data and Qinematic™ Posture Scan 3D test data.

Standing Posture - Side View

This is the side view with the plumbline (white dashed) and the results from the scan.

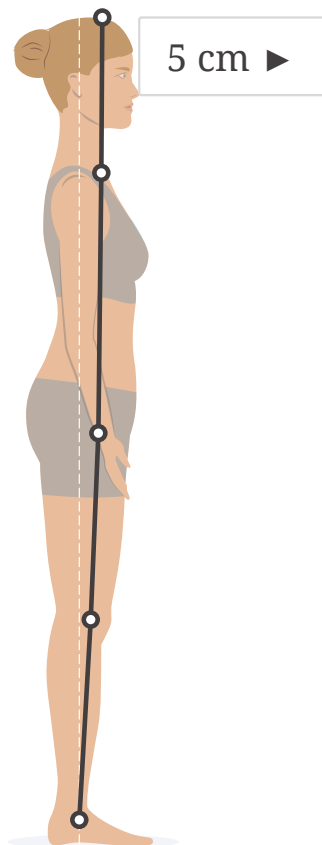

| Sagittal angle of the neck relative to frontal axis* |   |
|------------------------------------------------------|---|
| Forward neck angle (deg)                             | 0 |

\*Ventral is positive (+), dorsal is negative (-).

| Anterior displacement from plumbline* |   |
|---------------------------------------|---|
| Center of head (cm)                   | 5 |
| Center of shoulders (cm)              | 5 |
| Center of body mass (cm)              | 1 |
| Center of pelvis (cm)                 | 4 |

\*Ventral is positive (+), dorsal is negative (-).

| Critical angles (forwards/backwards)* |    | Notes                    |
|---------------------------------------|----|--------------------------|
| Cervicothoracic angle (deg)           | 0  | Between trunk and neck.  |
| Lumbopelvic angle (deg)               | -2 | Between trunk and thigh. |

\*Ventral is positive (+), dorsal is negative (-).

| Knee angles in frontal plane | Flex |
|------------------------------|------|
| Left knee (deg)              | 0    |
| Right knee (deg)             | 2    |

| Sagittal angle of the thighs relative to frontal axis* |   |
|--------------------------------------------------------|---|
| Forward angle of the left thigh (deg)                  | 3 |
| Forward angle of the right thigh (deg)                 | 1 |

\*Ventral is positive (+), dorsal is negative (-).

| Rotation*                      | Left | Right |
|--------------------------------|------|-------|
| Shoulders axial rotation (deg) | 0    | 0     |
| Pelvic axial rotation (deg)    | 2    | -2    |

\*Ventral is positive (+), dorsal is negative (-).

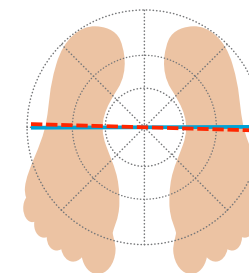

— Shoulders axial rotation  
 - - - Pelvic axial rotation

Information in this report should be verified and interpreted by a health professional.  
 Measures are estimates, calculated from a combination of normative anthropometric data and Qinematic™ Posture Scan 3D test data.

Standing Balance - Bilateral

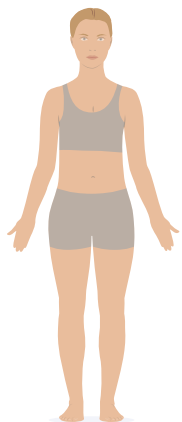

Sway pattern of center of mass in sagittal (anterior/posterior, Ant/Pos) and transversal (mediolateral, Left/Right) plane during 8 seconds of bilateral stance.

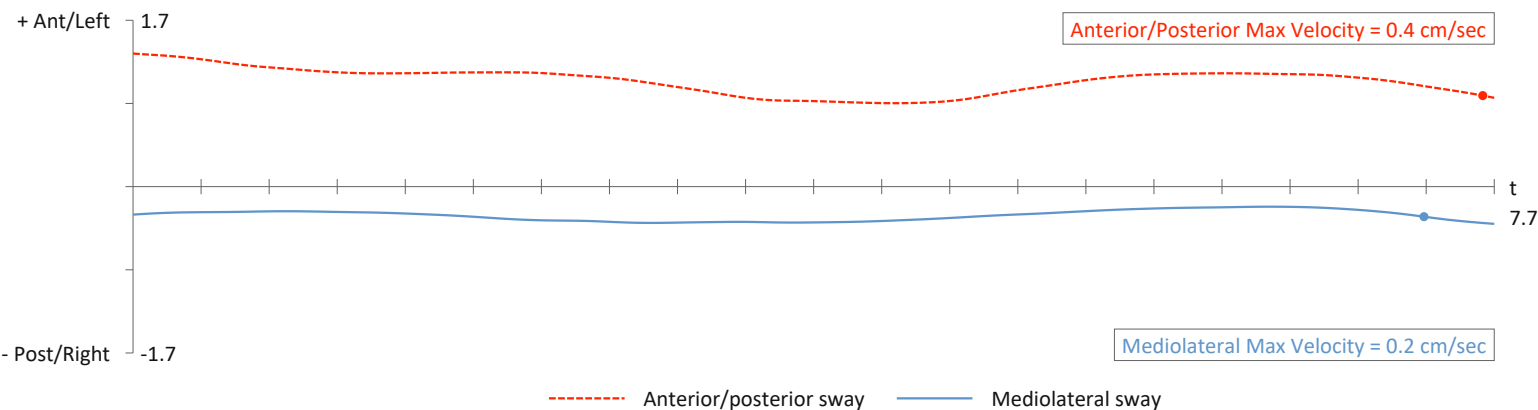

This is the view from cranial of the person in bilateral stance.

The table shows the:

1. Percentage mediolateral displacement (left and right) of the center of mass from the midline.
2. The 'sway area' created by postural sway.

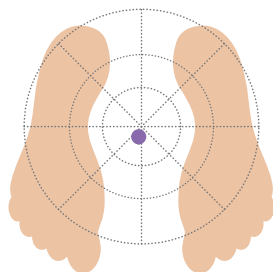

Center of mass  
● net position

| Bilateral stance - Eyes Open<br>(Center of mass) | Mediolat |       |
|--------------------------------------------------|----------|-------|
|                                                  | Left     | Right |
| Displacement (%)                                 | 48       | 52    |
| Sway area (cm <sup>2</sup> )                     | 0.0      |       |

This footprint view of the body shows the location of the center of mass of the body in relation to the base of support (feet) in bilateral stance.

## Standing Balance - Unilateral

Sway pattern of center of mass in sagittal (anterior/posterior, Ant/Pos) and transversal (mediolateral, Left/Right) plane during single leg balance.

The movement/time graphs below show the amount of postural sway in anterior (Ant)/posterior (Pos), red and medial (Med)/lateral (Lat), blue direction. Higher amplitudes correspond with greater movements.

This is the view from cranial of the person in single leg balance.

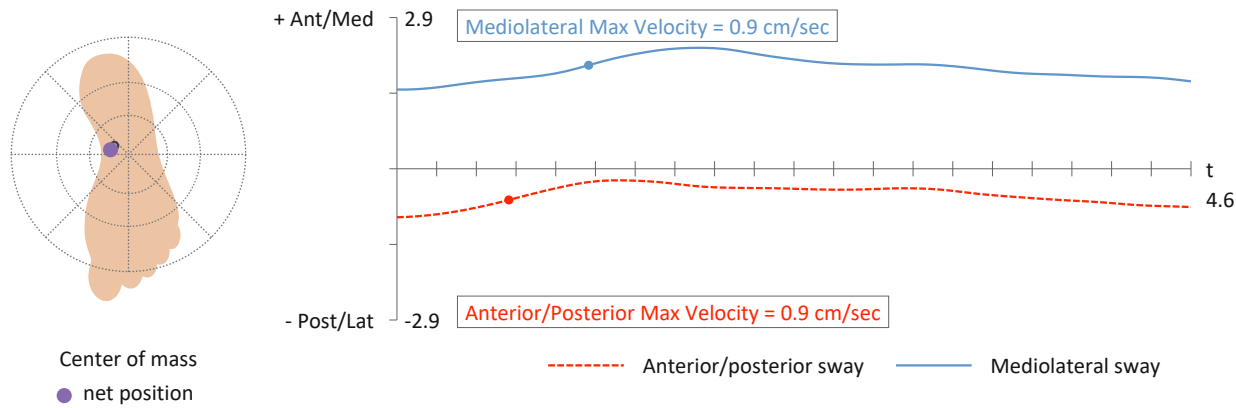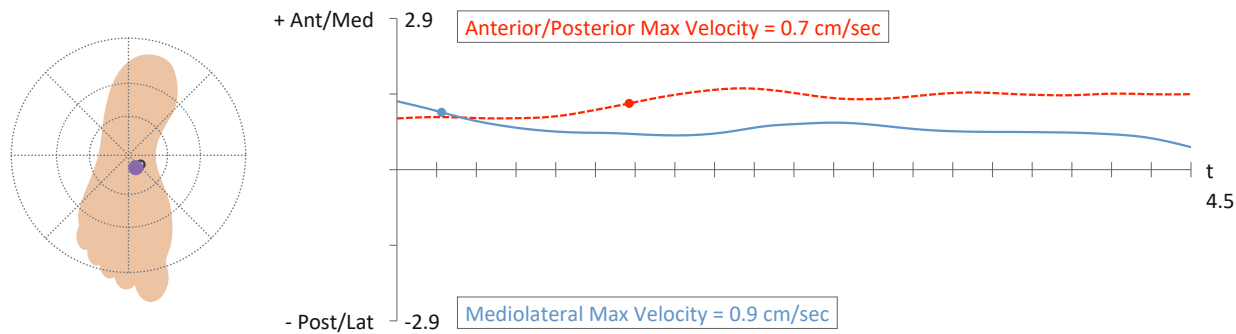

Information in this report should be verified and interpreted by a health professional.

Measures are estimates, calculated from a combination of normative anthropometric data and Qinematic™ Posture Scan 3D test data.

## Standing Side Bend

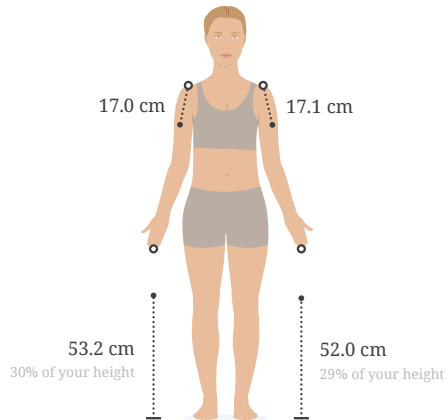

The vertical distance from the floor is used to estimate side reach. Multiple body parts contribute to the movement.

**Segmental movements:**

The movement/time graphs show the amount of superior/inferior placement and the tabulated data shows the amount of lateral displacement for the hands, chest, shoulders and hips.

A movement is positive when it follows the same direction to the bending side.

Higher amplitudes correspond to greater vertical placement.

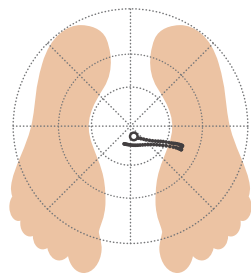

Center of mass

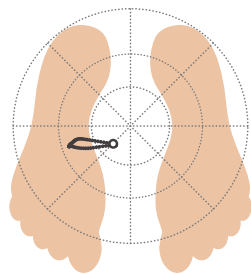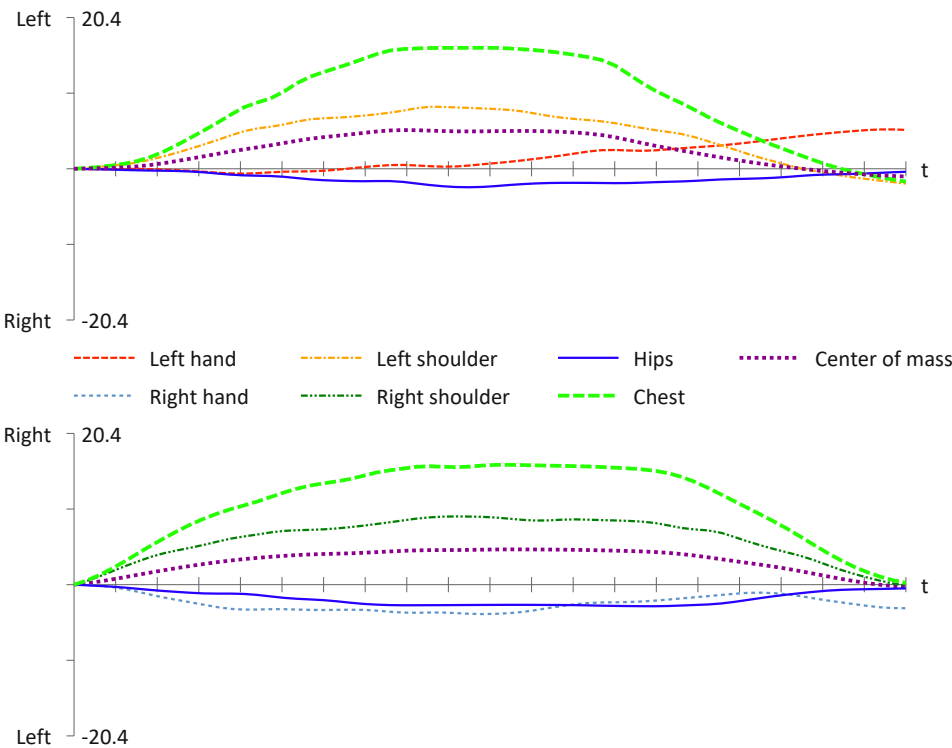

| Left Bend               | Mediolat |       | Diff with Right Bend |
|-------------------------|----------|-------|----------------------|
|                         | Left     | Right |                      |
| Distance to floor (cm)  | 52.0     |       | -2%                  |
| Weight distribution (%) | 80.1     | 19.9  | -                    |
| Hips (cm)               |          | 2.5   | 0.4 cm               |
| Chest (cm)              | 16.3     |       | 1%                   |
| Left hand (cm)          | 5.3      |       | -                    |
| Left shoulder (cm)      | 8.4      |       | -9%                  |

| Right Bend              | Mediolat |       | Diff with Left Bend |
|-------------------------|----------|-------|---------------------|
|                         | Left     | Right |                     |
| Distance to floor (cm)  |          | 53.2  | 2%                  |
| Weight distribution (%) | 13.8     | 86.2  | -                   |
| Hips (cm)               | 2.9      |       | -0.4 cm             |
| Chest (cm)              |          | 16.2  | -1%                 |
| Right hand (cm)         | 4.0      |       | -                   |
| Right shoulder (cm)     |          | 9.2   | 10%                 |

Information in this report should be verified and interpreted by a health professional.

Measures are estimates, calculated from a combination of normative anthropometric data and Qinematic™ Posture Scan 3D test data.

## Double Leg Squat

The hips, knees and shoulders are tracked.

The table quantifies the amount of movement in the coronal and transversal planes, as well as the difference between left and right sides for a single squat.

The trajectory angle estimates the line of best fit for the pathway of key body parts. Our own studies indicate that variation between trials is minimal on the way down (eccentric phase) and larger on the way up (concentric phase).

Lateral (Lat) movements are denoted as positive (+).

Medial (Med) movements are denoted as negative (-).

Hip movements to left are denoted as positive (+), hip movements to right are denoted as negative (-).

This is the front view of the person.

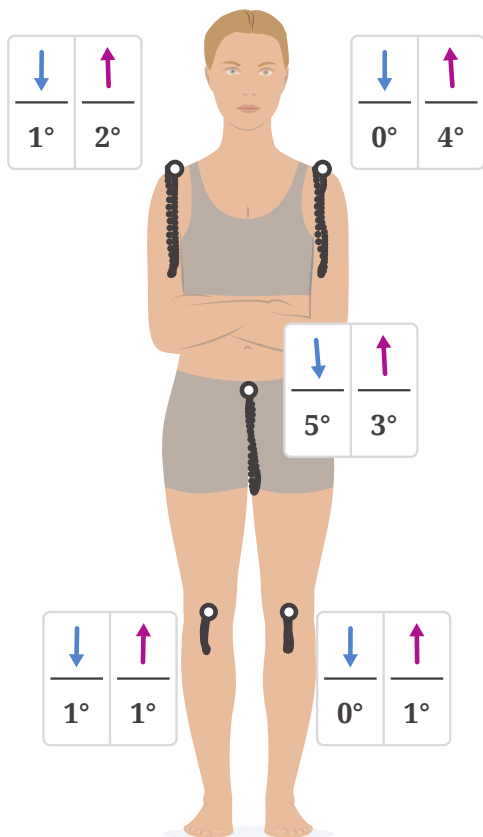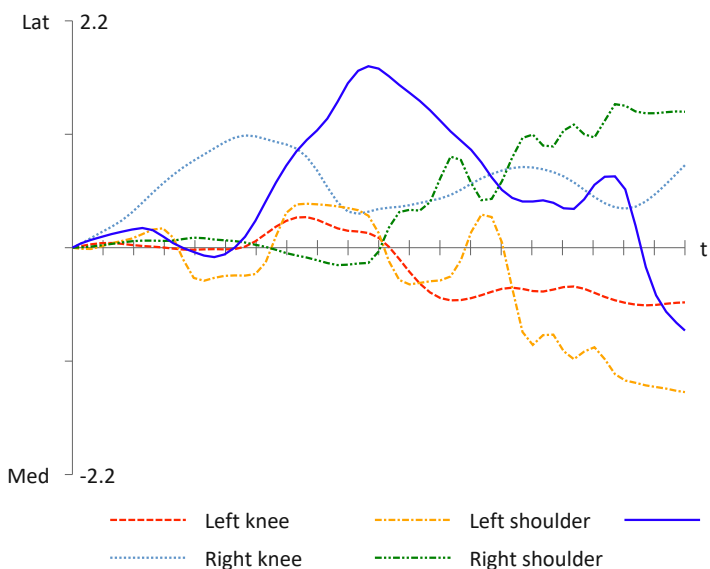

| Segment        |      | Vertical Shift |        | Lateral Shift |     | Trajectory Angle |  |
|----------------|------|----------------|--------|---------------|-----|------------------|--|
|                |      | cm             | % diff | cm            | deg | diff             |  |
| Left shoulder  | down | 21.3           | 0%     | -0.3          | 0   | -4               |  |
|                | up   | 21.3           |        | -1.1          | -4  |                  |  |
| Right shoulder | down | 21.2           | 1%     | 0.9           | 1   | -3               |  |
|                | up   | 21.5           |        | 0.4           | 2   |                  |  |
| Left knee      | down | 7.5            | -3%    | -0.5          | 0   | -1               |  |
|                | up   | 7.7            |        | 0.0           | -1  |                  |  |
| Right knee     | down | 7.8            | 4%     | 0.5           | 1   | 0                |  |
|                | up   | 8.1            |        | 0.3           | -1  |                  |  |
| Hips           | down | 20.5           | 0%     | 1.1           | 5   | 2                |  |
|                | up   | 20.4           |        | -2.0          | -3  |                  |  |

Information in this report should be verified and interpreted by a health professional.  
 Measures are estimates, calculated from a combination of normative anthropometric data and Qinematic™ Posture Scan 3D test data.

# Single Leg Squat

The hips, knees and shoulders are tracked.

The table quantifies the amount of movement in the coronal and transversal planes, as well as the difference between left and right sides for a single squat. The trajectory angle estimates the line of best fit for the pathway of key body parts. Our own studies indicate that variation between trials is minimal on the way down (eccentric phase) and larger on the way up (concentric phase).

All references are relative to starting position.

This is the front view of the person.

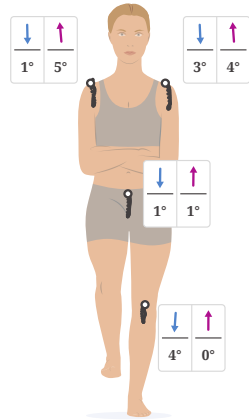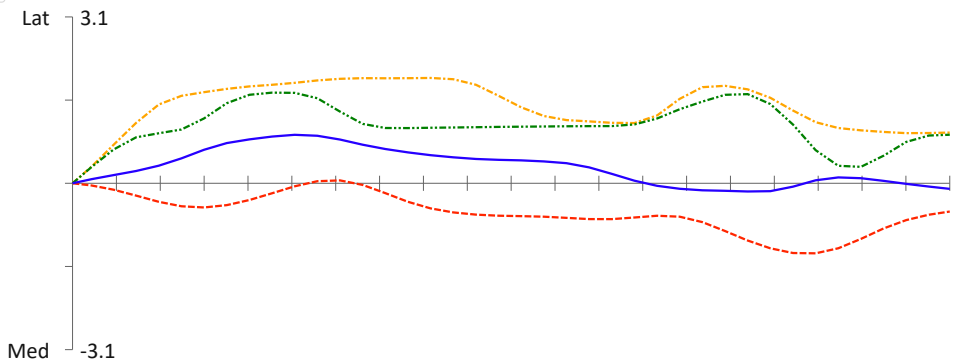

--- Left knee      - - - - Left shoulder      — Hips  
 ..... Right knee      - · - · - Right shoulder

| Segment        |      | Vertical Shift |        | Lateral Shift |     | Trajectory Angle |      |
|----------------|------|----------------|--------|---------------|-----|------------------|------|
|                |      | cm             | % diff | cm            | deg | deg              | diff |
| Left shoulder  | down | 10.4           | -5%    | 1.3           | 3   | -1               |      |
|                | up   | 11.0           |        | -0.3          | -4  |                  |      |
| Right shoulder | down | 9.1            | -14%   | 1.2           | 1   | -4               |      |
|                | up   | 10.6           |        | -0.3          | -5  |                  |      |
| Left knee      | down | 7.0            | -8%    | -0.6          | -4  | -4               |      |
|                | up   | 7.6            |        | 0.1           | 0   |                  |      |
| Hips           | down | 9.2            | -2%    | 0.0           | -1  | 0                |      |
|                | up   | 9.4            |        | -0.1          | 1   |                  |      |

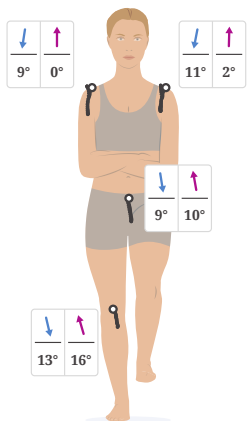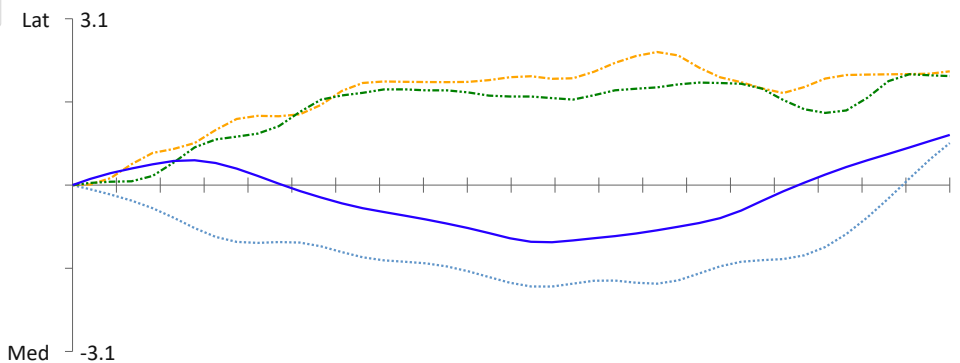

| Segment        |      | Vertical Shift |        | Lateral Shift |     | Trajectory Angle |      |
|----------------|------|----------------|--------|---------------|-----|------------------|------|
|                |      | cm             | % diff | cm            | deg | deg              | diff |
| Left shoulder  | down | 9.4            | 9%     | 2.3           | 11  | -9               |      |
|                | up   | 10.4           |        | -0.2          | -2  |                  |      |
| Right shoulder | down | 10.7           | 5%     | 1.8           | 9   | -9               |      |
|                | up   | 11.3           |        | 0.3           | 0   |                  |      |
| Right knee     | down | 7.2            | 4%     | -1.8          | -13 | -3               |      |
|                | up   | 7.5            |        | 2.5           | 16  |                  |      |
| Hips           | down | 9.3            | 5%     | -0.9          | -9  | -1               |      |
|                | up   | 9.8            |        | 1.9           | 10  |                  |      |

Information in this report should be verified and interpreted by a health professional.

Measures are estimates, calculated from a combination of normative anthropometric data and Qinematic™ Posture Scan 3D test data.
